# Supplementary material
Source: Springer Nature journal article supplement (http://www.springermedizin.de/resource/supplementary/12937_2008_214_MOESM1_ESM.pdf/25654636)
Supplement: MOESM1 [file 25654636]

**Supplemental file 1:** Nitrate, nitrite, and nitrosamine content of food items listed in the food database and reference information used to generate the summary estimates by category

**Reported nitrate content of food items listed in the food database and reference information used to generate the summary estimates by category.**

| NBDPS Food Item           | Food Name              | Mean <sup>a</sup><br>(mg/100g) | Value<br>Type <sup>b</sup> | Range <sup>c</sup> | Sample<br>Size <sup>c</sup> | Author                    | Rank |
|---------------------------|------------------------|--------------------------------|----------------------------|--------------------|-----------------------------|---------------------------|------|
| <b>Dairy Products</b>     |                        |                                |                            |                    |                             |                           |      |
| Cheese                    | Cheese                 | 1.610                          | mn                         | 0.12-5.6           | 130                         | French National Inventory | 2    |
|                           | Cheese (Camembert)     | 1.600                          | mn                         | 0.24-4.05          | 30                          | French National Inventory | 2    |
|                           | Cheese (Holland)       | 2.400                          | mn                         | 0.74-5.6           | 10                          | French National Inventory | 2    |
|                           | Cheese (Pyrenees)      | 0.400                          | mn                         | 0.12-1.2           | 10                          | French National Inventory | 2    |
|                           | Cheese (Sant-Nectaire) | 1.800                          | mn                         | 0.12-5.50          | 30                          | French National Inventory | 2    |
|                           | Cheese (spread)        | 1.700                          | mn                         | 0.43-4.3           | 30                          | French National Inventory | 2    |
|                           | Cheese                 | 0.050                          | w                          |                    |                             | Howe et al.               | 1    |
|                           | Cream cheese           | 0.050                          | mn                         |                    |                             | Pobel et al.              | 2    |
|                           | Hard cheese            | 1.700                          | mn                         |                    |                             | Pobel et al.              | 2    |
|                           | Soft cheese            | 1.600                          | mn                         |                    |                             | Pobel et al.              | 2    |
|                           | Creamed cheese         | 0.025                          | mn                         | <0.50              | 4                           | Thomson and Swallow       | 2    |
|                           | Cheese                 | 0.150                          | mn                         | <0.3               | 31                          | Von Collet                | 2    |
| Cottage or ricotta cheese | Cottage Cheese         | 0.230                          | mn                         | <0.5-0.9           | 4                           | Thomson and Swallow       | 2    |
| Ice cream <sup>d</sup>    | Milk, sugar, eggs      | 0.29                           | mn                         |                    |                             |                           |      |
| Skim or low fat milk      | Milk                   | 0.460                          | mp                         | 0.39-0.53          | 20                          | Food Standards Agency     | 2    |
|                           | Milk (skim milk)       | 0.050                          | mn                         |                    |                             | Pobel et al.              | 2    |
|                           | Milk                   | 0.150                          | mp                         | <0.3               | 9                           | Von Collet                | 2    |
| Whole milk                | Milk                   | 0.460                          | mp                         | 0.39-0.53          | 20                          | Food Standards Agency     | 2    |
|                           | Milk (whole)           | 0.050                          | w                          | tr-0.34            | 217                         | Mahieu et al.             | 2    |
|                           | Milk                   | 0.150                          | mp                         | <0.3               | 9                           | Von Collet                | 2    |
| Yogurt                    | Yogurt                 | 0.050                          | mn                         |                    |                             | Pobel et al.              | 2    |
|                           | Yogurt                 | 0.150                          | mp                         | <0.3               | 6                           | Von Collet                | 2    |
| <b>Fruit Products</b>     |                        |                                |                            |                    |                             |                           |      |
| Avocado or guacamole      | Fruit                  | 2.700                          | mn                         | 1.2-4.6            | 20                          | Food Standards Agency     | 2    |
|                           | Fruit                  | 2.000                          | w                          |                    |                             | Natl. Academy of Sciences | 3    |
|                           | Fresh fruit            | 2.000                          | mn                         |                    |                             | Pobel et al.              | 2    |
| Bananas                   | Bananas                | 2.000                          | w                          |                    |                             | Cornee                    | 2    |
| Cantaloupe                | Watermelon             | 9.500                          | mn                         |                    | 1                           | Tamme                     | 5    |
| Fresh apples or pears     | Pear                   | 0.390                          | mn                         | <0.3-1.08          | 24                          | Von Collet                | 2    |
|                           | Apple                  | 1.750                          | mn                         | <0.3-10.8          | 22                          | Von Collet                | 2    |
| Fruit drinks              | Fruit juices           | 0.970                          | w                          |                    |                             | Howe et al.               | 1    |
| Orange juice              | Oranges                | 2.000                          | w                          |                    |                             | Howe et al.               | 1    |
| Oranges                   | Oranges                | 2.000                          | w                          |                    |                             | Howe et al.               | 1    |
| Other fruits              | Fruit                  | 2.700                          | mn                         | 1.2-4.6            | 20                          | Food Standards Agency     | 2    |
|                           | Fruit                  | 2.000                          | w                          |                    |                             | Natl. Academy of Sciences | 3    |
|                           | Fresh fruit            | 2.000                          | mn                         |                    |                             | Pobel et al.              | 2    |
|                           | Grapes                 | 0.810                          | mn                         | <0.3-3.40          | 23                          | Von Collet                | 2    |

|                                                          |                        |        |    |            |    |                           |   |
|----------------------------------------------------------|------------------------|--------|----|------------|----|---------------------------|---|
|                                                          | Strawberry             | 7.170  | mn | 2.43-15.34 | 9  | Von Collet                | 2 |
| Peaches, apricots, plums,<br>or nectarines               | Peach                  | 0.780  | mn | <0.3-3.13  | 13 | Von Collet                | 2 |
|                                                          | Apricot                | 0.600  | mn | <0.3-0.95  | 3  | Von Collet                | 2 |
|                                                          | Nectarine              | 0.150  | mn | <0.3-0.89  | 5  | Von Collet                | 2 |
|                                                          | Plum                   | 0.880  | mn | <0.3-2.03  | 4  | Von Collet                | 2 |
| Raw chile peppers                                        | Pepper (sweet)         | 12.000 | w  |            |    | Natl. Academy of Sciences | 3 |
|                                                          | Pepper (sweet green)   | 6.200  | mn |            |    | Siciliano et al.          | 3 |
|                                                          | Peppers (sweet)        | 5.000  | mn |            | 3  | Siciliano et al.          | 3 |
| Salsa (fruit or tomato) <sup>d</sup>                     | Tomato, peppers, onion | 3.51   | mn |            |    |                           |   |
| Onion <sup>e</sup>                                       | Onion                  | 4.800  | mn |            | 8  | Food Standards Agency     | 2 |
|                                                          | Onion                  | 2.300  | mn |            | 63 | French National Inventory | 2 |
|                                                          | Onion, chopped         | 3.300  | mn |            | 1  | Siciliano et al.          | 3 |
|                                                          | Onion, whole           | 12.800 | mn |            | 1  | Siciliano et al.          | 3 |
|                                                          | Onion                  | 5.500  | mn |            | 21 | Tamme                     | 5 |
|                                                          | Onion                  | 8.000  | mn |            |    | Thomson and Swallow       | 2 |
|                                                          | Onion                  | 4.800  | mn |            |    | Thomson and Swallow       | 2 |
|                                                          | Onion                  | 2.300  | mn |            |    | Thomson and Swallow       | 2 |
|                                                          | Onion                  | 5.110  | mn |            | 4  | Von Collet                | 2 |
| Tomatoes or tomato juice                                 | Tomato                 | 1.700  | mn | 0.4-4.2    | 4  | Food Standards Agency     | 2 |
|                                                          | Tomato                 | 3.300  | mn | 0.14-58.9  | 62 | French National Inventory | 2 |
|                                                          | Tomatoes               | 5.800  | w  |            |    | Howe et al.               | 1 |
|                                                          | Tomato                 | 5.800  | w  |            |    | Natl. Academy of Sciences | 3 |
|                                                          | Tomato                 | 3.080  | mn |            |    | Pobel et al.              | 2 |
|                                                          | Tomato                 | 3.020  | mn | <0.3-8.94  | 9  | Von Collet                | 2 |
| <b>Grain Products</b>                                    |                        |        |    |            |    |                           |   |
| Biscuits, scones, croissants<br>and muffins <sup>d</sup> | Four, butter, milk     | 0.41   | mn |            |    |                           |   |
| Cereal                                                   | Cereal                 | 2.500  | w  |            |    | Cornee                    | 2 |
|                                                          | Cereals                | 0.105  | mp | 0.10-0.11  | 20 | Food Standards Agency     | 2 |
|                                                          | Cereal, cooked         | 1.200  | w  |            |    | Howe et al.               | 1 |
|                                                          | Cereal                 | 0.940  | mn | 0.68-1.16  | 9  | Von Collet                | 2 |
| Dark bread                                               | Wheat flour            | 0.850  | mn |            |    | Pobel et al.              | 2 |
| Rice or pasta                                            | Rice, non specific     | 1.200  | w  |            |    | Howe et al.               | 1 |
|                                                          | Pasta                  | 1.240  | w  |            |    | Howe et al.               | 1 |
|                                                          | Pasta, rice            | 2.500  | mn |            |    | Pobel et al.              | 2 |
| Tortilla                                                 | Bread (non specific)   | 0.760  | mp | 0.72-0.8   | 20 | Food Standards Agency     | 2 |
|                                                          | Bread                  | 2.500  | w  | 0.64-6.14  | 20 | French National Inventory | 2 |
|                                                          | Bread (non specific)   | 1.200  | w  |            |    | Howe et al.               | 1 |
|                                                          | White bread            | 2.500  | mn |            |    | Pobel et al.              | 2 |
| White bread                                              | Bread (non specific)   | 0.760  | mp | 0.72-0.8   | 20 | Food Standards Agency     | 2 |
|                                                          | Bread                  | 2.500  | w  | 0.64-6.14  | 20 | French National Inventory | 2 |
|                                                          | Bread (non specific)   | 1.200  | w  |            |    | Howe et al.               | 1 |
|                                                          | White bread            | 2.500  | mn |            |    | Pobel et al.              | 2 |
| <b>Meat and Bean Products</b>                            |                        |        |    |            |    |                           |   |
| Bacon                                                    | Bacon                  | 10.110 | mn | 0.14-44.47 | 57 | Food Standards Agency     | 2 |

|                               |                          |        |    |            |    |                           |   |
|-------------------------------|--------------------------|--------|----|------------|----|---------------------------|---|
|                               | Bacon                    | 3.200  | w  |            |    | Howe et al.               | 1 |
|                               | Bacon                    | 3.650  | mn | <0.5-8.1   | 10 | Thomson and Swallow       | 2 |
| Beans or lentils              | Black-eyed peas          | 0.900  | mn |            | 2  | Siciliano et al.          | 3 |
| Beans, refried                | Black-eyed peas          | 0.900  | mn |            | 2  | Siciliano et al.          | 3 |
| Beef, pork, lamb <sup>g</sup> |                          |        |    |            |    |                           |   |
|                               | <i>Pork sub group</i>    |        |    |            |    |                           |   |
|                               | Ham                      | 15.700 | w  | 0.30-92.1  | 37 | Cornee                    | 2 |
|                               | Pork (shoulder)          | 10.170 | mn | 0.83-27.99 | 3  | Food Standards Agency     | 2 |
|                               | Ham                      | 7.170  | mn | 0.03-44.59 | 57 | Food Standards Agency     | 2 |
|                               | Ham (chopped)            | 3.910  | mn | 0.33-14.22 | 8  | Food Standards Agency     | 2 |
|                               | Ham (mountain)           | 16.300 | mn | 0.37-81.15 | 17 | French National Inventory | 2 |
|                               | Pork                     | 4.950  | w  |            |    | Howe et al.               | 1 |
|                               | Ham                      | 15.660 | mn |            |    | Pobel et al.              | 2 |
|                               | Pork                     | 0.740  | mn |            |    | Saccani and Tanzi         | 2 |
|                               | Pork shoulder            | 0.510  | mn | 0.36-1.02  | 15 | Saccani and Tanzi         | 2 |
|                               | Pork loin                | 0.390  | mn | 0.36-1.02  | 11 | Saccani and Tanzi         | 2 |
|                               | Dry cured ham            | 4.830  | mn | 0.17-10.4  | 13 | Saccani and Tanzi         | 2 |
|                               | Ham                      | 1.660  | mn | <0.5-3.2   | 10 | Thomson and Swallow       | 2 |
|                               | <i>Beef sub group</i>    |        |    |            |    |                           |   |
|                               | Beef (corned)            | 2.160  | mn | 0.44-7.0   | 11 | Food Standards Agency     | 2 |
|                               | Beef                     | 5.180  | mn | 2.1-8.25   | 2  | Food Standards Agency     | 2 |
|                               | Corned beef              | 14.160 | w  |            |    | Howe et al.               | 1 |
|                               | Beef                     | 0.380  | mn |            |    | Saccani and Tanzi         | 2 |
|                               | Beef filet               | 0.460  | mn | 0.24-0.92  | 12 | Saccani and Tanzi         | 2 |
|                               | Beef mince               | 0.370  | mn | <0.5-1.5   | 4  | Thomson and Swallow       | 2 |
|                               | Corned silverside        | 1.810  | mn | 0.7-3.6    | 10 | Thomson and Swallow       | 2 |
|                               | <i>Meat sub group</i>    |        |    |            |    |                           |   |
|                               | Meat                     | 1.000  | w  |            |    | Natl. Academy of Sciences | 3 |
|                               | Red meat                 | 1.000  | mn |            |    | Pobel et al.              | 2 |
|                               | Smoked Meat              | 13.930 | mn |            |    | Pobel et al.              | 2 |
| Chicken livers                | Pâté (chicken liver)     | 3.420  | mn | 0.45-5.36  | 4  | Food Standards Agency     | 2 |
| Chicken or Turkey             |                          |        |    |            |    |                           |   |
|                               | <i>Chicken sub group</i> |        |    |            |    |                           |   |
|                               | Chicken                  | 0.820  | mn | 0.59-1.25  | 3  | Food Standards Agency     | 2 |
|                               | Chicken                  | 0.510  | mn | 0.26-0.89  | 10 | Saccani and Tanzi         | 2 |
|                               | <i>Turkey sub group</i>  |        |    |            |    |                           |   |
|                               | Turkey                   | 0.750  | mn | 0.05-1.39  | 6  | Food Standards Agency     | 2 |
|                               | <i>Poultry sub group</i> |        |    |            |    |                           |   |
|                               | Poultry                  | 0.830  | mp | 0.81-0.85  | 20 | Food Standards Agency     | 2 |
|                               | Poultry                  | 1.000  | mn |            |    | Pobel et al.              | 2 |
| Eggs                          | Egg                      | 0.490  | mp | 0.44-0.54  | 20 | Food Standards Agency     | 2 |
|                               | Egg                      | 1.000  | w  |            |    | Howe et al.               | 1 |
|                               | Egg                      | 1.000  | mn |            |    | Pobel et al.              | 2 |
| Fish                          | Fish, smoked             | 1.000  | mn | 0.88-5.76  | 5  | Cornee                    | 2 |
|                               | Fish                     | 1.200  | w  | 0.1-4.1    |    | Cornee                    | 2 |
|                               | Fish                     | 0.100  | w  | 0.88-5.76  | 5  | Cornee                    | 2 |
|                               | Fish                     | 1.100  | mn | 0.5-1.9    | 20 | Food Standards Agency     | 2 |
|                               | Fish, other              | 1.000  | w  |            |    | Howe et al.               | 1 |
|                               | Fish, smoked             | 0.190  | w  |            |    | Howe et al.               | 1 |
|                               | Fresh fish               | 1.180  | mn |            |    | Pobel et al.              | 2 |
|                               | Smoked Fish              | 1.030  | mn |            |    | Pobel et al.              | 2 |

|                                                  |                        |        |    |            |    |                           |   |
|--------------------------------------------------|------------------------|--------|----|------------|----|---------------------------|---|
| Hamburger                                        | Hamburger              | 7.900  | mn | 0.6-21.1   | 4  | Thomson and Swallow       | 2 |
| Hot dogs                                         | Frankfurt              | 25.700 | mn | 6.14-186.2 | 10 | French National Inventory | 2 |
| Liver, non-specific                              | Sausage (liver)        | 9.370  | mn | 2.68-19.02 | 5  | Food Standards Agency     | 2 |
|                                                  | Pâté (liver)           | 18.300 | mn | 0.55-42.3  | 5  | French National Inventory | 2 |
|                                                  | Liver, beef            | 1.000  | w  |            |    | Howe et al.               | 1 |
| <b>Organ meats and tongue</b>                    |                        |        |    |            |    |                           |   |
| <i>Tongue sub group</i>                          | Tongue                 | 1.590  | mn | <0.002-5.5 | 20 | Food Standards Agency     | 2 |
| <i>Offals sub group</i>                          | Offals                 | 0.460  | mp | 0.39-0.53  | 20 | Food Standards Agency     | 2 |
|                                                  | Offals                 | 1.000  | mn |            |    | Pobel et al.              | 2 |
| Peas or lima beans                               | Peas                   | 1.100  | mn | 0.12-3.1   | 18 | French National Inventory | 2 |
|                                                  | Peas                   | 2.800  | w  |            |    | Natl. Academy of Sciences | 3 |
|                                                  | Lima beans             | 5.400  | w  |            |    | Natl. Academy of Sciences | 3 |
|                                                  | Peas                   | 1.010  | mn |            |    | Pobel et al.              | 2 |
|                                                  | Pea pods (Chinese)     | 1.300  | mn |            | 2  | Siciliano et al.          | 3 |
|                                                  | Green peas             | 2.000  | mn |            | 4  | Siciliano et al.          | 3 |
|                                                  | Peas                   | 0.600  | mn |            | 3  | Siciliano et al.          | 3 |
| <b>Processed meats</b>                           |                        |        |    |            |    |                           |   |
| <i>Sausage sub group</i>                         | Sausage (liver)        | 9.370  | mn | 2.68-19.02 | 5  | Food Standards Agency     | 2 |
|                                                  | Sausage                | 17.600 | mn | 0.72-115.8 | 10 | French National Inventory | 2 |
|                                                  | Sausage (garlic)       | 24.800 | mn | 1.78-56.2  | 10 | French National Inventory | 2 |
|                                                  | Sausage                | 18.100 | mn | 0.18-154.5 | 20 | French National Inventory | 2 |
|                                                  | Saucisson              | 3.300  | mn | 0.15-18.4  | 24 | French National Inventory | 2 |
|                                                  | Sausage (beef & pork)  | 9.790  | w  |            |    | Howe et al.               | 1 |
|                                                  | Cured meat (sausage)   | 13.600 | mn |            |    | Pobel et al.              | 2 |
|                                                  | Dry cured sausage      | 1.550  | mn | 0.14-7.69  | 24 | Saccani and Tanzi         | 2 |
|                                                  | Saveloys (red sausage) | 2.850  | mn | 0.8-6.3    | 10 | Thomson and Swallow       | 2 |
|                                                  | Beef sausages          | 0.180  | mn | <0.5-1.8   | 10 | Thomson and Swallow       | 2 |
| <i>Salami sub group</i>                          | Salami                 | 2.480  | mn | <0.5-5.6   | 10 | Thomson and Swallow       | 2 |
| <i>Luncheon sub group</i>                        | Luncheon meat          | 2.070  | mn | 0.64-4.88  | 19 | Food Standards Agency     | 2 |
|                                                  | Luncheon               | 3.090  | mn | 2.2-5.3    | 10 | Thomson and Swallow       | 2 |
| <i>Pâté sub group</i>                            | Pâté (chicken liver)   | 3.420  | mn | 0.45-5.36  | 4  | Food Standards Agency     | 2 |
|                                                  | Pâté (liver)           | 18.300 | mn | 55-42.3    | 5  | French National Inventory | 2 |
|                                                  | Pâté                   | 2.100  | mn | 1.35-2.64  | 5  | French National Inventory | 2 |
| <i>Preserved meat sub group</i>                  | Preserved meat         | 8.100  | mn |            |    | Pobel et al.              | 2 |
| <b>Vegetable Products</b>                        |                        |        |    |            |    |                           |   |
| Broccoli                                         | Broccoli               | 74.000 | w  |            |    | Natl. Academy of Sciences | 3 |
|                                                  | Broccoli (spears)      | 46.400 | mn |            | 6  | Siciliano et al.          | 3 |
|                                                  | Broccoli (chopped)     | 57.300 | mn |            | 4  | Siciliano et al.          | 3 |
|                                                  | Broccoli               | 13.300 | mn | 5.1-28     | 8  | Thomson and Swallow       | 2 |
| <b>Cabbage, cauliflower, or Brussels sprouts</b> |                        |        |    |            |    |                           |   |
| <i>Cabbage sub group</i>                         | Cabbage                | 33.800 | mn |            | 16 | Food Standards Agency     | 2 |
|                                                  | Cabbage                | 16.000 | mn | 0.25-79.2  | 94 | French National Inventory | 2 |
|                                                  | Kale                   | 33.000 | mn | 7.7-58.4   | 30 | French National Inventory | 2 |
|                                                  | Cabbage                | 52.000 | w  |            |    | Howe et al.               | 1 |
|                                                  | Kale                   | 80.000 | w  |            |    | Natl. Academy of Sciences | 3 |

|                                    |                         |         |    |            |     |                           |   |
|------------------------------------|-------------------------|---------|----|------------|-----|---------------------------|---|
|                                    | White cabbage           | 39.500  | mn |            | 40  | Petersen and Stoltze      | 2 |
|                                    | Chinese cabbage         | 100.000 | mn |            | 30  | Petersen and Stoltze      | 2 |
|                                    | Cabbage                 | 15.210  | mn |            |     | Pobel et al.              | 2 |
|                                    | Cabbage                 | 78.400  | mn |            |     | Siciliano et al.          | 3 |
|                                    | Kale                    | 277.000 | mn |            | 3   | Siciliano et al.          | 3 |
|                                    | Kale                    | 160.000 | mn |            | 3   | Siciliano et al.          | 3 |
|                                    | Sauerkraut              | 6.800   | mn |            | 1   | Siciliano et al.          | 3 |
|                                    | Silverbeet              | 74.000  | mn | 19.0-169.0 | 8   | Thomson and Swallow       | 2 |
|                                    | Cabbage                 | 33.100  | mn | 12.0-69.0  | 8   | Thomson and Swallow       | 2 |
|                                    | Cabbage                 | 26.390  | mn | 2.90-63.62 | 16  | Von Collet                | 2 |
| <i>Cauliflower sub group</i>       | Cauliflower             | 8.600   | mn |            | 8   | Food Standards Agency     | 2 |
|                                    | Cauliflower             | 10.700  | mn | 0.3-77.1   | 53  | French National Inventory | 2 |
|                                    | Cauliflower             | 48.000  | w  |            |     | Natl. Academy of Sciences | 3 |
|                                    | Cauliflower             | 25.400  | mn |            | 5   | Siciliano et al.          | 3 |
| <i>Brussels sprouts sub group</i>  | Brussels sprouts        | 5.900   | mn |            | 4   | Food Standards Agency     | 2 |
|                                    | Brussels sprouts        | 2.200   | mn | 0.15-9.7   | 30  | French National Inventory | 2 |
|                                    | Brussels sprouts        | 12.000  | w  |            |     | Natl. Academy of Sciences | 3 |
|                                    | Brussels sprouts        | 8.400   | mn |            | 7   | Siciliano et al.          | 3 |
| Carrots (cooked, raw) <sup>h</sup> | Carrot                  | 9.700   | w  | 1.5-11.5   | 20  | Food Standards Agency     | 2 |
|                                    | Carrot                  | 18.400  | mn | 0.12-137.2 | 80  | French National Inventory | 2 |
|                                    | Carrots                 | 20.000  | w  |            |     | Howe et al.               | 1 |
|                                    | Carrot                  | 20.000  | w  |            |     | Natl. Academy of Sciences | 3 |
|                                    | Carrot                  | 17.620  | mn |            |     | Pobel et al.              | 2 |
|                                    | Carrot                  | 7.200   | mn |            | 8   | Siciliano et al.          | 3 |
|                                    | Carrot                  | 9.700   | mn |            | 5   | Siciliano et al.          | 3 |
|                                    | Carrot                  | 20.500  | mn |            | 18  | Siciliano et al.          | 3 |
|                                    | Carrot                  | 5.830   | mn | <0.5-29.0  | 8   | Thomson and Swallow       | 2 |
|                                    | Carrot                  | 28.810  | mn | 3.51-84.16 | 7   | Von Collet                | 2 |
| Corn                               | Corn                    | 4.500   | w  |            |     | Natl. Academy of Sciences | 3 |
|                                    | Corn                    | 4.500   | mn |            | 3   | Siciliano et al.          | 3 |
| Potatoes                           | Potatoes                | 15.500  | mn | 0.3-107.7  | 180 | Food Standards Agency     | 2 |
|                                    | Potatoes (white)        | 14.400  | mn | 0.12-119.1 | 116 | French National Inventory | 2 |
|                                    | Potatoes, non specific  | 11.000  | w  |            |     | Howe et al.               | 1 |
|                                    | Potato                  | 11.000  | mn | 0.7-30.4   | 40  | Petersen and Stoltze      | 2 |
|                                    | Potatoes                | 14.220  | mn |            |     | Pobel et al.              | 2 |
|                                    | Potatoes (whole, small) | 15.000  | mn |            | 1   | Siciliano et al.          | 3 |
|                                    | Potatoes (whole)        | 6.300   | mn |            | 2   | Siciliano et al.          | 3 |
|                                    | Potatoes (sliced)       | 6.900   | mn |            | 1   | Siciliano et al.          | 3 |
|                                    | Potatoes                | 12.900  | mn | 4.8-24.0   | 8   | Thomson and Swallow       | 2 |
| Soy milk or soy yogurt             | Soybean sprouts         | 5.600   | mn |            | 40  | Chung et al.              | 5 |
|                                    | Miso and Shoyu          | 0.030   | mn |            |     | Maki et al. 35            | 5 |
| Spinach or collard greens          |                         |         |    |            |     |                           |   |
| <i>Spinach sub group</i>           | Lettuce                 | 105.100 | mn |            | 22  | Food Standards Agency     | 2 |
|                                    | Spinach                 | 163.100 | mn |            | 13  | Food Standards Agency     | 2 |
|                                    | Spinach                 | 44.300  | mn | 3.6-114.9  | 41  | French National Inventory | 2 |
|                                    | Lettuce                 | 268.400 | mp | 5.8-540.6  | 159 | Merino et al.             | 2 |

|                                     |                                  |         |    |            |     |                           |   |
|-------------------------------------|----------------------------------|---------|----|------------|-----|---------------------------|---|
|                                     | Lettuce                          | 93.100  | mp | 9.4-229.8  | 71  | Merino et al.             | 2 |
|                                     | Spinach                          | 174.700 | mp | 4.7-597.5  | 63  | Merino et al.             | 2 |
|                                     | Spinach                          | 55.100  | mp | 21.3-186.2 | 70  | Merino et al.             | 2 |
|                                     | Lettuce                          | 82.600  | mp | 44.2-203.8 | 14  | Merino et al.             | 2 |
|                                     | Lettuce                          | 170.000 | w  |            |     | Natl. Academy of Sciences | 3 |
|                                     | Spinach                          | 180.000 | w  |            |     | Natl. Academy of Sciences | 3 |
|                                     | Lettuce                          | 170.000 | w  |            |     | Natl. Academy of Sciences | 3 |
|                                     | Lettuce                          | 107.400 | mn |            |     | Petersen and Stoltze      | 2 |
|                                     | Spinach                          | 68.000  | mn | 9.0-151.0  | 20  | Petersen and Stoltze      | 2 |
|                                     | Spinach                          | 178.300 | mn | 4.8-563.0  | 36  | Petersen and Stoltze      | 2 |
|                                     | Lettuce                          | 244.000 | mn |            | 122 | Petersen and Stoltze      | 2 |
|                                     | Lettuce                          | 136.280 | mn |            |     | Pobel et al.              | 2 |
|                                     | Spinach                          | 44.260  | mn |            |     | Pobel et al.              | 2 |
|                                     | Spinach                          | 222.000 | mn |            | 7   | Siciliano et al.          | 3 |
|                                     | Lettuce                          | 110.000 | mn |            |     | Siciliano et al.          | 3 |
|                                     | Spinach                          | 214.000 | mn |            | 4   | Siciliano et al.          | 3 |
|                                     | Spinach                          | 57.300  | mn |            | 1   | Siciliano et al.          | 3 |
|                                     | Lettuce                          | 159.000 | mn | 8.3-342.0  | 18  | Thomson and Swallow       | 2 |
|                                     | Spinach                          | 99.000  | mn | 10.0-156.0 | 8   | Thomson and Swallow       | 2 |
|                                     | Spinach                          | 154.970 | mn | 53.3-203.9 | 6   | Von Collet                | 2 |
|                                     | Lettuce                          | 186.810 | mn | 6.5-501.95 | 28  | Von Collet                | 2 |
| <i>Collard Greens sub group</i>     | Collard greens                   | 245.000 | mn |            | 4   | Siciliano et al.          | 3 |
|                                     | Mustard greens                   | 239.000 | mn |            | 4   | Siciliano et al.          | 3 |
|                                     | Turnip greens                    | 346.000 | mn |            | 3   | Siciliano et al.          | 3 |
|                                     | Collard greens                   | 264.000 | mn |            | 2   | Siciliano et al.          | 3 |
|                                     | Turnip greens                    | 223.000 | mn |            | 2   | Siciliano et al.          | 3 |
|                                     | Mustard greens                   | 136.000 | mn |            | 2   | Siciliano et al.          | 3 |
| Squash                              | Squash (acorn)                   | 3.400   | mn |            |     | Siciliano et al.          | 3 |
|                                     | Squash (butternut)               | 67.800  | mn |            |     | Siciliano et al.          | 3 |
|                                     | Squash (zucchini)                | 66.500  | mn |            |     | Siciliano et al.          | 3 |
|                                     | Squash                           | 16.000  | mn |            | 2   | Siciliano et al.          | 3 |
|                                     | Zucchini                         | 53.300  | mn |            | 4   | Siciliano et al.          | 3 |
| String Beans                        | Green beans                      | 15.040  | mn |            |     | Pobel et al.              | 2 |
|                                     | Green beans                      | 27.000  | mn |            | 4   | Siciliano et al.          | 3 |
|                                     | Green beans                      | 10.000  | mn |            | 5   | Siciliano et al.          | 3 |
| Tofu, tempeh or soy burgers         | Soybean sprouts                  | 5.600   | mn |            | 40  | Chung et al.              | 5 |
|                                     | Miso and Shoyu                   | 0.030   | mn |            |     | Maki et al.               | 5 |
| Yams or sweet potatoes              | Sweet potatoes                   | 4.600   | w  |            |     | Natl. Academy of Sciences | 3 |
| <b>Fats, Oils, Nuts, and Sweets</b> |                                  |         |    |            |     |                           |   |
| Butter                              | Butter and cream                 | 0.000   | mn |            |     | Pobel et al.              | 2 |
| Cake or donut                       | Cake                             | 2.500   | mn |            |     | Pobel et al.              | 2 |
| Candy without chocolate             | Sugar, sweets                    | 0.000   | mn |            |     | Pobel et al.              | 2 |
| Chocolate                           | Sugar, chocolate, sweets         | 0.000   | mn |            |     | Pobel et al.              | 2 |
| Cookies <sup>d</sup>                | Sugar, butter, milk, eggs, flour | 0.370   | mn |            |     |                           |   |
| French fried potatoes               | Potatoes (hash brown)            | 3.700   | mn |            | 2   | Siciliano et al.          | 3 |

|                            |                       |       |    |           |    |                       |   |
|----------------------------|-----------------------|-------|----|-----------|----|-----------------------|---|
| Margarine                  | Margarine             | 0.050 | w  |           |    | Howe et al.           | 1 |
| Nuts                       | Nuts                  | 0.580 | mp | 0.55-0.61 | 20 | Food Standards Agency | 2 |
| Oil and Vinegar dressing   | Salad Dressing        | 0.000 | mn |           |    | Howe et al.           | 2 |
|                            | Oil                   | 0.000 | mn |           |    | Pobel et al.          | 2 |
| Peanut butter              | Nuts                  | 0.580 | mp | 0.55-0.61 | 20 | Food Standards Agency | 2 |
| Pie                        | Pie                   | 1.870 | mn |           |    | Howe et al.           | 1 |
| Potato chips or corn chips | Potatoes (hash brown) | 3.700 | mn |           | 2  | Siciliano et al.      | 3 |

<sup>a</sup> Mean is either the average, weighted mean, midpoint, or half the detection limit when reported as less than the detection limit as listed under nitrate value type.

<sup>b</sup> mn=mean, mp=mid point, w = weighted mean

<sup>c</sup> Information provided when reported in the literature; tr = trace amount

<sup>d</sup> recipe calculation

<sup>e</sup> item used in recipe calculation for salsa

<sup>f</sup> Beef, pork, lamb as a sandwich or mixed dish and beef, pork, lamb as a main dish are made up of the same values, only the serving size is different.

<sup>g</sup> Carrots raw or cooked are made up of the same values, only the serving size is different.

Reported nitrite content of food items listed in the food database and reference information used to generate the summary estimates by category.

| NBDPS Food Item        | Food Name                 | Mean <sup>a</sup><br>(mg/100g) | Value<br>Type <sup>b</sup> | Range <sup>c</sup> | Sample<br>Size <sup>c</sup> | Author                    | Rank                |
|------------------------|---------------------------|--------------------------------|----------------------------|--------------------|-----------------------------|---------------------------|---------------------|
| <b>Dairy Products</b>  |                           |                                |                            |                    |                             |                           |                     |
| Cheese                 | Cheese                    | 0.079                          | mn                         | 0.01-0.36          | 130                         | French National Inventory | 2                   |
|                        | Cheese (Camembert)        | 0.170                          | mn                         | 0.07-0.60          | 30                          | French National Inventory | 2                   |
|                        | Cheese (Holland)          | 0.060                          | mn                         | 0.03-0.13          | 10                          | French National Inventory | 2                   |
|                        | Cheese (Pyrenees)         | 0.040                          | mn                         | 0.02-0.07          | 10                          | French National Inventory | 2                   |
|                        | Cheese (Sant-Nectaire)    | 0.107                          | mn                         | 0.01-0.29          | 30                          | French National Inventory | 2                   |
|                        | Cheese (spread)           | 0.100                          | mn                         | 0.03-0.27          | 30                          | French National Inventory | 2                   |
|                        | Cheese                    | 0.000                          | w                          |                    |                             | Howe et al.               | 1                   |
|                        | Cream cheese              | 0.000                          | mn                         |                    |                             | Pobel et al.              | 2                   |
|                        | Hard cheese               | 0.100                          | mn                         |                    |                             | Pobel et al.              | 2                   |
|                        | Soft cheese               | 0.070                          | mn                         |                    |                             | Pobel et al.              | 2                   |
|                        | Creamed cheese            | 0.025                          | mn                         | <1.0               | 4                           | Thomson and Swallow       | 2                   |
|                        | Cheese                    | 0.010                          | mn                         | <0.02              | 31                          | Von Collet                | 2                   |
|                        | Cottage or ricotta cheese | Cottage cheese                 | 0.000                      | mn                 | <1.5                        | 4                         | Thomson and Swallow |
| Ice cream <sup>d</sup> | Milk, sugar, eggs         | 0.053                          | mn                         |                    |                             |                           |                     |
| Skim or low fat milk   | Milk                      | 0.002                          | mp                         | 0-0.004            | 20                          | Food Standards Agency     | 2                   |
|                        | Milk                      | 0.000                          | mn                         |                    |                             | Pobel et al.              | 2                   |
|                        | Milk                      | 0.010                          | mn                         | <0.02              | 9                           | Von Collet                | 2                   |
| Whole milk             | Milk                      | 0.002                          | mp                         | 0-0.004            | 20                          | Food Standards Agency     | 2                   |
|                        | Milk                      | 0.000                          | w                          | tr-0.01            | 450                         | Mahieu et al.             | 2                   |
|                        | Milk                      | 0.010                          | mn                         | <0.02              | 9                           | Von Collet                | 2                   |
| Yogurt                 | Yogurt                    | 0.000                          | mn                         |                    |                             | Pobel et al.              | 2                   |
|                        | Yogurt                    | 0.034                          | mp                         | 0.01-0.05          | 6                           | Von Collet                | 2                   |
| <b>Fruit Products</b>  |                           |                                |                            |                    |                             |                           |                     |
| Avocado or guacamole   | Fruit                     | 0.040                          | mn                         | <0.04-0.05         | 20                          | Food Standards Agency     | 2                   |
|                        | Fruit                     | 0.000                          | w                          |                    |                             | Natl. Academy of Sciences | 3                   |
|                        | Fresh fruit               | 0.000                          | mn                         |                    |                             | Pobel et al.              | 2                   |
| Bananas                | Fruit                     | 0.040                          | mn                         | <0.04-0.05         | 20                          | Food Standards Agency     | 2                   |
|                        | Fruit                     | 0.000                          | w                          |                    |                             | Natl. Academy of Sciences | 3                   |
|                        | Fresh fruit               | 0.000                          | mn                         |                    |                             | Pobel et al.              | 2                   |
| Cantaloupe             | Fruit                     | 0.040                          | mn                         | <0.04-0.05         | 20                          | Food Standards Agency     | 2                   |
|                        | Fruit                     | 0.000                          | w                          |                    |                             | Natl. Academy of Sciences | 3                   |
|                        | Fresh fruit               | 0.000                          | mn                         |                    |                             | Pobel et al.              | 2                   |
| Fresh apples or pears  | Pear                      | 0.010                          | mp                         | <0.02              | 24                          | Von Collet                | 2                   |
|                        | Apple                     | 0.010                          | mp                         | <0.02              | 22                          | Von Collet                | 2                   |
| Fruit drinks           | Fruit juices              | 0.000                          | w                          |                    |                             | Howe et al.               | 1                   |
| Orange juice           | Oranges                   | 0.000                          | w                          |                    |                             | Howe et al.               | 1                   |
| Oranges                | Oranges                   | 0.000                          | w                          |                    |                             | Howe et al.               | 1                   |
| Other fruits           | Fruit                     | 0.040                          | mn                         | <0.04-0.05         | 20                          | Food Standards Agency     | 2                   |
|                        | Fruit                     | 0.000                          | w                          |                    |                             | Natl. Academy of Sciences | 3                   |



|                                                          |                         |       |    |            |    |                           |   |
|----------------------------------------------------------|-------------------------|-------|----|------------|----|---------------------------|---|
|                                                          | Fresh fruit             | 0.000 | mn |            |    | Pobel et al.              | 2 |
|                                                          | Grapes                  | 0.010 | mp | <0.02      | 23 | Von Collet                | 2 |
|                                                          | Strawberry              | 0.010 | mp | <0.02      | 9  | Von Collet                | 2 |
| Peaches, apricots, plums,<br>or nectarines               | Peach                   | 0.010 | mp | <0.02      | 13 | Von Collet                | 2 |
|                                                          | Apricot                 | 0.010 | mp | <0.02      | 13 | Von Collet                | 2 |
|                                                          | Nectarine               | 0.010 | mp | <0.02      | 5  | Von Collet                | 2 |
|                                                          | Plum                    | 0.065 | mn | <0.02      | 4  | Von Collet                | 2 |
| Raw chile peppers                                        | Pepper                  | 0.040 | w  |            |    | Natl. Academy of Sciences | 3 |
|                                                          | Pepper                  | 0.040 | mn |            |    | Siciliano et al.          | 3 |
|                                                          | Peppers                 | 0.070 | mn |            | 3  | Siciliano et al.          | 3 |
| Salsa (fruit or tomato) <sup>d</sup>                     | Tomato, peppers, onions | 0.054 | mn |            |    | Food Standards Agency     | 2 |
| Onion <sup>e</sup>                                       | Onion                   | 0.070 | mn |            | 63 | French National Inventory | 2 |
|                                                          | Onion, chopped          | 0.100 | mn |            | 1  | Siciliano et al.          | 3 |
|                                                          | Onion, whole            | 0.040 | mn |            | 1  | Siciliano et al.          | 3 |
|                                                          | Onion                   | 0.020 | mn |            | 4  | Von Collet                | 2 |
| Tomatoes or tomato juice                                 | Tomato                  | 0.050 | mn | 0.01-0.21  | 62 | French National Inventory | 2 |
|                                                          | Tomatoes                | 0.000 | w  |            |    | Howe et al.               | 1 |
|                                                          | Tomato                  | 0.030 | mn |            |    | Pobel et al.              | 2 |
|                                                          | Tomato                  | 0.010 | mp | <0.02      | 9  | Von Collet                | 2 |
| <b>Grain Products</b>                                    |                         |       |    |            |    |                           |   |
| Biscuits, scones, croissants<br>and muffins <sup>d</sup> | Flour, butter, milk     | 0.040 | mn |            |    |                           |   |
| Cereal                                                   | Cereal                  | 0.130 | w  |            |    | Cornee                    | 2 |
|                                                          | Cereals                 | 0.180 | mn | <0.04-0.08 | 20 | Food Standards Agency     | 2 |
|                                                          | Cereal, cooked          | 0.260 | w  |            |    | Howe et al.               | 1 |
|                                                          | Cereal                  | 0.010 | mp | <0.02      | 9  | Von Collet                | 2 |
| Dark bread                                               | Wheat flour             | 0.120 | mn |            |    | Pobel et al.              | 2 |
| Rice or pasta                                            | Rice, non specific      | 0.260 | w  |            |    | Howe et al.               | 1 |
|                                                          | Pasta                   | 0.260 | w  |            |    | Howe et al.               | 1 |
|                                                          | Pasta, rice             | 0.130 | mn |            |    | Pobel et al.              | 2 |
| Tortilla                                                 | Bread                   | 0.200 | mp | <0.02-0.4  | 20 | Food Standards Agency     | 2 |
|                                                          | Bread                   | 0.130 | w  | 0.01-0.67  | 20 | French National Inventory | 2 |
|                                                          | Bread                   | 0.260 | w  |            |    | Howe et al.               | 1 |
|                                                          | White bread             | 0.130 | mn |            |    | Pobel et al.              | 2 |
| White bread                                              | Bread                   | 0.200 | mp | <0.02-0.4  | 20 | Food Standards Agency     | 2 |
|                                                          | Bread                   | 0.130 | w  | 0.01-0.67  | 20 | French National Inventory | 2 |
|                                                          | Bread                   | 0.260 | w  |            |    | Howe et al.               | 1 |
|                                                          | White bread             | 0.130 | mn |            |    | Pobel et al.              | 2 |
| <b>Meat and Bean Products</b>                            |                         |       |    |            |    |                           |   |
| Bacon                                                    | Bacon                   | 3.190 | mn | <0.02-12.3 | 57 | Food Standards Agency     | 2 |
|                                                          | Bacon                   | 0.700 | w  |            |    | Howe et al.               | 1 |
|                                                          | Bacon                   | 1.590 | mn | <0.5-6.3   | 10 | Thomson and Swallow       | 2 |
| Beans or lentils                                         | Black-eyed peas         | 0.260 | mn |            | 2  | Siciliano et al.          | 3 |
| Refried Beans                                            | Black-eyed peas         | 0.260 | mn |            | 2  | Siciliano et al.          | 3 |

Beef, pork, lamb<sup>g</sup>

|                          |                      |       |    |            |    |                           |   |
|--------------------------|----------------------|-------|----|------------|----|---------------------------|---|
| <i>Pork sub group</i>    | Ham                  | 1.580 | w  | 0.07-184.0 | 37 | Cornee                    | 2 |
|                          | Pork (shoulder)      | 5.350 | mn | 1.96-10.37 | 3  | Food Standards Agency     | 2 |
|                          | Ham                  | 2.910 | mn | 0.22-16.97 | 57 | Food Standards Agency     | 2 |
|                          | Ham (chopped)        | 0.920 | mn | 0.06-2.69  | 8  | Food Standards Agency     | 2 |
|                          | Ham (mountain)       | 3.400 | mn | 0.07-18.40 | 17 | French National Inventory | 2 |
|                          | Pork                 | 0.720 | w  |            |    | Howe et al.               | 1 |
|                          | Ham                  | 1.580 | mn |            |    | Pobel et al.              | 2 |
|                          | Pork                 | 0.070 | mn |            |    | Saccani and Tanzi         | 2 |
|                          | Dry cured ham        | 1.130 | mn | 0.18-1.94  | 13 | Saccani and Tanzi         | 2 |
|                          | Ham                  | 1.990 | mn | <0.5-11.9  | 10 | Thomson and Swallow       | 2 |
| <i>Beef sub group</i>    | Beef (corned)        | 1.260 | mn | <0.02-7.15 | 11 | Food Standards Agency     | 2 |
|                          | Beef                 | 1.240 | mn | 0.42-2.06  | 2  | Food Standards Agency     | 2 |
|                          | Corned beef          | 1.940 | w  |            |    | Howe et al.               | 1 |
|                          | Beef                 | 0.080 | mn |            |    | Saccani and Tanzi         | 2 |
|                          | Beef mince           | 0.250 | mp | <0.5       | 4  | Thomson and Swallow       | 2 |
|                          | Corned silverside    | 0.900 | mn | <0.5-1.5   | 10 | Thomson and Swallow       | 2 |
| <i>Meat sub group</i>    | Meat                 | 0.100 | w  |            |    | Natl. Academy of Sciences | 3 |
|                          | Red meat             | 0.100 | mn |            |    | Pobel et al.              | 2 |
|                          | Smoked meat          | 1.200 | mn |            |    | Pobel et al.              | 2 |
| Chicken Livers           | Pâté (chicken liver) | 2.040 | mn | 0.5-5.55   | 4  | Food Standards Agency     | 2 |
| Chicken or Turkey        |                      |       |    |            |    |                           |   |
| <i>Chicken sub group</i> | Chicken              | 0.730 | mn | 0.11-1.90  | 3  | Food Standards Agency     | 2 |
|                          | Chicken              | 0.060 | mn |            |    | Saccani and Tanzi         | 2 |
| <i>Turkey sub group</i>  | Turkey               | 0.530 | mn | <0.02-2.0  | 6  | Food Standards Agency     | 2 |
| <i>Poultry sub group</i> | Poultry              | 0.045 | mp | 0.04-0.05  | 20 | Food Standards Agency     | 2 |
|                          | Poultry              | 0.100 | mn |            |    | Pobel et al.              | 2 |
| Eggs                     | Egg                  | 0.170 | mn |            | 20 | Food Standards Agency     | 2 |
|                          | Egg                  | 0.100 | w  |            |    | Howe et al.               | 1 |
|                          | Egg                  | 0.100 | mn |            |    | Pobel et al.              | 2 |
| Fish                     | Fish, smoked         | 0.900 | mn | 0.1-1.6    | 5  | Cornee                    | 2 |
|                          | Fish                 | 0.190 | w  | 0-1.69     |    | Cornee                    | 2 |
|                          | Fish                 | 0.900 | w  | 0.1-1.6    | 5  | Cornee                    | 2 |
|                          | Fish                 | 0.030 | mp | nd-0.06    | 20 | Food Standards Agency     | 2 |
|                          | Fish, other          | 0.100 | w  |            |    | Howe et al.               | 1 |
|                          | Fish, smoked         | 0.020 | w  |            |    | Howe et al.               | 1 |
|                          | Fresh fish           | 0.100 | mn |            |    | Pobel et al.              | 2 |
|                          | Fish, smoked         | 0.900 | mn |            |    | Pobel et al.              | 2 |
| Hamburger                | Hamburger            | 0.250 | mp | <0.5       | 4  | Thomson and Swallow       | 2 |
| Hot dogs                 | Frankfurt            | 2.710 | mn | 0.27-13.6  | 10 | French National Inventory | 2 |
| Liver                    | Sausage (liver)      | 3.430 | mn | 0.79-9.01  | 5  | Food Standards Agency     | 2 |
|                          | Pâté (liver)         | 0.890 | mn | 0.35-1.75  | 5  | French National Inventory | 2 |
|                          | Liver, beef          | 0.100 | w  |            |    | Howe et al.               | 1 |
| Organ meats and tongue   |                      |       |    |            |    |                           |   |
| <i>Tongue sub group</i>  | Tongue               | 1.040 | mn | 0.2-3.13   | 20 | Food Standards Agency     | 2 |
| <i>Offals sub group</i>  | Offals               | 0.090 | mn | 0.02-0.17  | 20 | Food Standards Agency     | 2 |

|                                           |                         |       |    |           |     |                           |   |
|-------------------------------------------|-------------------------|-------|----|-----------|-----|---------------------------|---|
|                                           | Offals                  | 0.100 | mn |           |     | Pobel et al.              | 2 |
| Peas or lima beans                        | Peas                    | 0.070 | mn | 0.007-.28 | 18  | French National Inventory | 2 |
|                                           | Peas                    | 0.060 | w  |           |     | Natl. Academy of Sciences | 3 |
|                                           | Lima beans              | 0.110 | w  |           |     | Natl. Academy of Sciences | 3 |
|                                           | Peas                    | 0.070 | mn |           |     | Pobel et al.              | 2 |
|                                           | Pea pods                | 0.060 | mn |           | 2   | Siciliano et al.          | 3 |
|                                           | Green peas              | 0.070 | mn |           | 4   | Siciliano et al.          | 3 |
|                                           | Peas                    | 0.040 | mn |           | 3   | Siciliano et al.          | 3 |
| Processed meats                           |                         |       |    |           |     |                           |   |
| <i>Sausage sub group</i>                  | Sausage (liver)         | 3.430 | mn | 0.79-9.01 | 5   | Food Standards Agency     | 2 |
|                                           | Sausage                 | 0.940 | mn | 0.61-1.15 | 10  | French National Inventory | 2 |
|                                           | Sausage (garlic)        | 1.800 | mn | 0.23-3.53 | 10  | French National Inventory | 2 |
|                                           | Sausage                 | 2.600 | mn | 0.07-15.2 | 20  | French National Inventory | 2 |
|                                           | Saucisson               | 0.920 | mn | 0.05-3.33 | 24  | French National Inventory | 2 |
|                                           | Sausage (beef and pork) | 1.070 | w  |           |     | Howe et al.               | 1 |
|                                           | Cured meat (sausage)    | 1.260 | mn |           |     | Pobel et al.              | 2 |
|                                           | Dry cured sausage       | 0.450 | mn | 0.21-1.60 | 24  | Saccani and Tanzi         | 2 |
|                                           | Saveloys (red sausage)  | 3.560 | mn | 0.9-5.3   | 10  | Thomson and Swallow       | 2 |
|                                           | Beef sausages           | 0.250 | mp | <0.5      |     | Thomson and Swallow       | 2 |
| <i>Salami sub group</i>                   | Salami                  | 0.740 | mn | <0.5-3.6  | 10  | Thomson and Swallow       | 2 |
| <i>Lunchmeat sub group</i>                | Luncheon meat           | 1.430 | mn | 0.13-5.56 | 19  | Food Standards Agency     | 2 |
|                                           | Luncheon                | 2.460 | mn | <0.5-7.1  | 10  | Thomson and Swallow       | 2 |
| <i>Pâté sub group</i>                     | Pâté (chicken liver)    | 2.040 | mn | 0.5-5.55  | 4   | Food Standards Agency     | 2 |
|                                           | Pâté (liver)            | 0.890 | mn | 0.35-1.75 | 5   | French National Inventory | 2 |
|                                           | Pâté                    | 0.400 | mn | 0.33-0.53 | 5   | French National Inventory | 2 |
| <i>Preserved meat sub group</i>           | Preserved meat          | 0.380 | mn |           |     | Pobel et al.              | 2 |
| <b>Vegetable Products</b>                 |                         |       |    |           |     |                           |   |
| Broccoli                                  | Broccoli                | 0.100 | w  |           |     | Natl. Academy of Sciences | 3 |
|                                           | Broccoli (spears)       | 0.100 | mn |           | 6   | Siciliano et al.          | 3 |
|                                           | Broccoli (chopped)      | 0.100 | mn |           | 4   | Siciliano et al.          | 3 |
|                                           | Broccoli                | 0.600 | mn | <0.5-2.7  | 8   | Thomson and Swallow       | 2 |
| Cabbage, cauliflower, or Brussels sprouts |                         |       |    |           |     |                           |   |
| <i>Cabbage sub group</i>                  | Cabbage                 | 0.110 | mn | 0.01-1.01 | 94  | French National Inventory | 2 |
|                                           | Kale                    | 0.230 | mn | 0.05-0.93 | 30  | French National Inventory | 2 |
|                                           | Cabbage                 | 0.050 | w  |           |     | Howe et al.               | 1 |
|                                           | Kale                    | 0.100 | w  |           |     | Natl. Academy of Sciences | 3 |
|                                           | White cabbage           | 0.016 | mn |           | 118 | Petersen and Stoltze      | 2 |
|                                           | Chinese cabbage         | 0.034 | mn |           | 114 | Petersen and Stoltze      | 2 |
|                                           | Cabbage                 | 0.200 | mn |           |     | Pobel et al.              | 2 |
|                                           | Cabbage                 | 0.050 | mn |           |     | Siciliano et al.          | 3 |
|                                           | Kale                    | 0.180 | mn |           | 3   | Siciliano et al.          | 3 |
|                                           | Kale                    | 0.020 | mn |           | 3   | Siciliano et al.          | 3 |
|                                           | Sauerkraut              | 0.040 | mn |           | 1   | Siciliano et al.          | 3 |
|                                           | Silverbeet              | 0.250 | mn | <0.5      | 8   | Thomson and Swallow       | 2 |
|                                           | Cabbage                 | 0.250 | mn | <0.5      | 8   | Thomson and Swallow       | 2 |

|                                    |                         |       |    |            |     |                           |   |
|------------------------------------|-------------------------|-------|----|------------|-----|---------------------------|---|
|                                    | Cabbage                 | 0.120 | mn | <.02-0.95  | 16  | Von Collet                | 2 |
| <i>Cauliflower sub group</i>       | Cauliflower             | 0.440 | mn | 0.01-9.6   | 53  | French National Inventory | 2 |
|                                    | Cauliflower             | 0.110 | w  |            |     | Natl. Academy of Sciences | 3 |
|                                    | Cauliflower             | 0.110 | mn |            | 5   | Siciliano et al.          | 3 |
| <i>Brussels sprouts sub group</i>  | Brussels sprouts        | 0.080 | mn | 0.01-.27   | 30  | French National Inventory | 2 |
|                                    | Brussels sprouts        | 0.100 | w  |            |     | Natl. Academy of Sciences | 3 |
|                                    | Brussels sprouts        | 0.100 | mn |            | 7   | Siciliano et al.          | 3 |
| Carrots (cooked, raw) <sup>h</sup> | Carrot                  | 0.150 | mn | 0.007-2.80 | 80  | French National Inventory | 2 |
|                                    | Carrots                 | 0.080 | w  |            |     | Howe et al.               | 1 |
|                                    | Carrot                  | 0.080 | w  |            |     | Natl. Academy of Sciences | 3 |
|                                    | Carrot                  | 0.120 | mn |            |     | Pobel et al.              | 2 |
|                                    | Carrot                  | 0.060 | mn |            | 8   | Siciliano et al.          | 3 |
|                                    | Carrot                  | 0.100 | mn |            | 5   | Siciliano et al.          | 3 |
|                                    | Carrot                  | 0.110 | mn |            | 18  | Siciliano et al.          | 3 |
|                                    | Carrot                  | 0.250 | mn | <0.5       | 8   | Thomson and Swallow       | 2 |
|                                    | Carrot                  | 0.010 | mn | <0.02      | 7   | Von Collet                | 2 |
| Corn                               | Corn                    | 0.200 | w  |            |     | Natl. Academy of Sciences | 3 |
|                                    | Corn                    | 0.200 | mn |            | 3   | Siciliano et al.          | 3 |
| Potatoes                           | Potatoes                | 0.015 | mp | 0.02-0.05  | 20  | Food Standards Agency     | 2 |
|                                    | Potatoes (white)        | 0.160 | mn | 0.01-1.2   | 116 | French National Inventory | 2 |
|                                    | Potatoes, non specific  | 0.060 | w  |            |     | Howe et al.               | 1 |
|                                    | Potato                  | 0.060 | mn | 0-.26      | 127 | Petersen and Stoltze      | 2 |
|                                    | Potatoes                | 0.110 | mn |            |     | Pobel et al.              | 2 |
|                                    | Potatoes (whole, small) | 0.080 | mn |            | 1   | Siciliano et al.          | 3 |
|                                    | Potatoes (whole)        | 0.050 | mn |            | 2   | Siciliano et al.          | 3 |
|                                    | Potatoes (sliced)       | 0.040 | mn |            | 1   | Siciliano et al.          | 3 |
|                                    | Potatoes                | 0.250 | mn | <0.5       | 8   | Thomson and Swallow       | 2 |
| Soy milk or soy yogurt             | Soybean sprouts         | 0.090 | mn |            | 40  | Chung et al.              | 5 |
| Spinach or collard greens          |                         |       |    |            |     |                           |   |
| <i>Spinach sub group</i>           | Spinach                 | 1.000 | mn | 0.03-22.0  | 41  | French National Inventory | 2 |
|                                    | Lettuce                 | 0.040 | w  |            |     | Natl. Academy of Sciences | 3 |
|                                    | Spinach                 | 0.250 | w  |            |     | Natl. Academy of Sciences | 3 |
|                                    | Lettuce                 | 0.040 | w  |            |     | Natl. Academy of Sciences | 3 |
|                                    | Lettuce                 | 0.013 | mn |            |     | Petersen and Stoltze      | 2 |
|                                    | Spinach                 | 0.450 | mn |            | 20  | Petersen and Stoltze      | 2 |
|                                    | Spinach                 | 1.100 | mn |            | 36  | Petersen and Stoltze      | 2 |
|                                    | Lettuce                 | 0.020 | mn |            | 304 | Petersen and Stoltze      | 2 |
|                                    | Lettuce                 | 0.680 | mn |            |     | Pobel et al.              | 2 |
|                                    | Spinach                 | 0.770 | mn |            |     | Pobel et al.              | 2 |
|                                    | Spinach                 | 0.070 | mn |            | 7   | Siciliano et al.          | 3 |
|                                    | Lettuce                 | 0.040 | mn |            |     | Siciliano et al.          | 3 |
|                                    | Spinach                 | 0.610 | mn |            | 4   | Siciliano et al.          | 3 |
|                                    | Spinach                 | 0.070 | mn |            | 1   | Siciliano et al.          | 3 |
|                                    | Lettuce                 | 0.250 | mp | <0.5       | 18  | Thomson and Swallow       | 2 |
|                                    | Spinach                 | 0.250 | mp | <0.5       | 8   | Thomson and Swallow       | 2 |
|                                    | Spinach                 | 0.380 | mn | <0.02-1.96 | 6   | Von Collet                | 2 |

|                                     |                                  |       |    |            |    |                           |   |
|-------------------------------------|----------------------------------|-------|----|------------|----|---------------------------|---|
|                                     | Lettuce                          | 0.010 | mn | <0.02      | 28 | Von Collet                | 2 |
| <i>Collard greens sub group</i>     | Collard greens                   | 0.170 | mn |            | 4  | Siciliano et al.          | 3 |
|                                     | Mustard greens                   | 0.160 | mn |            | 4  | Siciliano et al.          | 3 |
|                                     | Turnip greens                    | 0.440 | mn |            | 3  | Siciliano et al.          | 3 |
|                                     | Collard greens                   | 0.020 | mn |            | 2  | Siciliano et al.          | 3 |
|                                     | Turnip greens                    | 0.020 | mn |            | 2  | Siciliano et al.          | 3 |
|                                     | Mustard greens                   | 0.030 | mn |            | 2  | Siciliano et al.          | 3 |
| Squash                              | Squash (acorn)                   | 0.040 | mn |            |    | Siciliano et al.          | 3 |
|                                     | Squash (butternut)               | 0.040 | mn |            |    | Siciliano et al.          | 3 |
|                                     | Squash (zucchini)                | 0.060 | mn |            |    | Siciliano et al.          | 3 |
|                                     | Squash                           | 0.090 | mn |            | 2  | Siciliano et al.          | 3 |
|                                     | Zucchini                         | 0.100 | mn |            | 4  | Siciliano et al.          | 3 |
| String Beans                        | Green beans                      | 1.260 | mn |            |    | Pobel et al.              | 2 |
|                                     | Green beans                      | 0.090 | mn |            | 4  | Siciliano et al.          | 3 |
|                                     | Green beans                      | 0.020 | mn |            | 4  | Siciliano et al.          | 3 |
| Tofu, tempeh or soy burgers         | Soybean sprouts                  | 0.090 | mn |            | 40 | Chung et al.              | 5 |
| Yams or sweet potatoes              | Sweet potatoes                   | 0.070 | w  |            |    | Natl. Academy of Sciences | 3 |
| <b>Fats, Oils, Nuts, and Sweets</b> |                                  |       |    |            |    |                           |   |
| Butter                              | Butter and cream                 | 0.000 | mn |            |    | Pobel et al.              | 2 |
| Cake or donut                       | Cake                             | 0.130 | mn |            |    | Pobel et al.              | 2 |
| Candy without chocolate             | Sugar, sweets                    | 0.000 | mn |            |    | Pobel et al.              | 2 |
| Chocolate                           | Sugar, chocolate, sweets         | 0.000 | mn |            |    | Pobel et al.              | 2 |
| Cookies <sup>d</sup>                | Sugar, butter, milk, eggs, flour | 0.043 | mn |            |    |                           |   |
| French fried potatoes               | Potatoes (hash brown)            | 0.070 | mn |            | 2  | Siciliano et al.          | 3 |
| Margarine                           | Margarine                        | 0.000 | w  |            |    | Howe et al.               | 1 |
| Nuts                                | Nuts                             | 0.035 | mp | <0.04-0.05 | 20 | Food Standards Agency     | 2 |
| Oil and Vinegar dressing            | Salad dressing                   | 0.000 | mn |            |    | Howe et al.               | 2 |
|                                     | Oil                              | 0.000 | mn |            |    | Pobel et al.              | 2 |
| Peanut butter                       | Nuts                             | 0.035 | mp | <0.04-0.05 | 20 | Food Standards Agency     | 2 |
| Pie                                 | Pie                              | 0.110 | mn |            |    | Howe et al.               | 1 |
| Potato chips or corn chips          | Potatoes (hash brown)            | 0.070 | mn |            | 2  | Siciliano et al.          | 3 |

<sup>a</sup> Mean is either the average, weighted mean, midpoint, or half the detection limit when reported as less than the detection limit as listed under nitrite value type.

<sup>b</sup> mn=mean, mp=mid point, w = weighted mean

<sup>c</sup> Information provided when reported in the literature; nd=not detected; tr = trace amount

<sup>d</sup> recipe calculation

<sup>e</sup> item used in recipe calculation for salsa

<sup>f</sup> Beef, pork, lamb as a sandwich or mixed dish and beef, pork, lamb as a main dish are made up of the same values, only the serving size is different.

<sup>g</sup> Carrots raw or cooked are made up of the same values, only the serving size is different.

Reported nitrosamine content of items listed in the food database and reference information used to generate the summary estimates by category

| NBDPS Food Item           | Food Name         | Mean <sup>a</sup><br>(µg/100g) | Total<br>Sample Size <sup>b</sup> | Author                | Rank |
|---------------------------|-------------------|--------------------------------|-----------------------------------|-----------------------|------|
| <b>Dairy Products</b>     |                   |                                |                                   |                       |      |
| Cheese                    | Cheese            | 0.200                          |                                   | Howe et al.           | 1    |
|                           | Cheese (blue)     | 0.050                          | 14                                | Klein et al.          | 2    |
|                           | Cheese (soft)     | 0.020                          |                                   | Klein et al.          | 2    |
|                           | Cheese            | 0.050                          | 12                                | Osterdahl             | 2    |
|                           | Cream cheese      | 0.001                          |                                   | Pobel et al.          | 2    |
|                           | Hard cheese       | 0.045                          |                                   | Pobel et al.          | 2    |
|                           | Soft cheese       | 0.045                          |                                   | Pobel et al.          | 2    |
|                           | Cheese            | 0.270                          | 209                               | Spiegelhalder         | 2    |
|                           | Cheese            | 0.034                          | 8                                 | Tricker et al.        | 2    |
| Cottage or ricotta cheese | Cheese            | 0.200                          |                                   | Howe et al.           | 1    |
|                           | Cheese (blue)     | 0.050                          | 14                                | Klein et al.          | 2    |
|                           | Cheese (soft)     | 0.020                          |                                   | Klein et al.          | 2    |
|                           | Cheese            | 0.050                          | 12                                | Osterdahl             | 2    |
|                           | Cream cheese      | 0.001                          |                                   | Pobel et al.          | 2    |
|                           | Hard cheese       | 0.045                          |                                   | Pobel et al.          | 2    |
|                           | Soft cheese       | 0.045                          |                                   | Pobel et al.          | 2    |
|                           | Cheese            | 0.270                          | 209                               | Spiegelhalder         | 2    |
|                           | Cheese            | 0.034                          | 8                                 | Tricker et al.        | 2    |
| Ice cream <sup>c</sup>    | Milk, sugar, eggs | 0.043                          |                                   |                       |      |
| Skim or low fat milk      | Milk              | 0.080                          | 57                                | Havery et al.         | 1    |
|                           | Milk              | 0.051                          |                                   | Pobel et al.          | 2    |
|                           | Milk              | 0.045                          | 9                                 | Tricker et al.        | 2    |
|                           | Milk              | 0.190                          | 7                                 | Libbey et al.         | 3    |
| Whole milk                | Milk              | 0.010                          | 10                                | Lakritz and Pensabene | 1    |
|                           | Milk              | 0.045                          | 9                                 | Tricker et al.        | 2    |
| Yogurt                    | Yogurt            | 0.001                          |                                   | Pobel et al.          | 2    |
| <b>Fruit Products</b>     |                   |                                |                                   |                       |      |
| Avocado or guacamole      | Fresh fruit       | 0.000                          |                                   | Pobel et al.          | 2    |
|                           | Fruit, fresh      | 0.005                          | 24                                | Tricker et al.        | 2    |
|                           | Fruit, products   | 0.005                          | 8                                 | Tricker et al.        | 2    |
| Bananas                   | Fresh fruit       | 0.000                          |                                   | Pobel et al.          | 2    |
|                           | Fruit, fresh      | 0.005                          | 24                                | Tricker et al.        | 2    |
|                           | Fruit, products   | 0.005                          | 8                                 | Tricker et al.        | 2    |
| Cantaloupe                | Fresh fruit       | 0.000                          |                                   | Pobel et al.          | 2    |
|                           | Fruit, fresh      | 0.005                          | 24                                | Tricker et al.        | 2    |
|                           | Fruit, products   | 0.005                          | 8                                 | Tricker et al.        | 2    |
| Fresh apples or pears     | Fresh fruit       | 0.000                          |                                   | Pobel et al.          | 2    |
|                           | Fruit, fresh      | 0.005                          | 24                                | Tricker et al.        | 2    |
|                           | Fruit, products   | 0.005                          | 8                                 | Tricker et al.        | 2    |

|                                            |                         |       |    |                 |   |
|--------------------------------------------|-------------------------|-------|----|-----------------|---|
| Fruit drinks                               | Fruit juices            | 0.000 |    | Howe et al.     | 1 |
| Orange juice                               | Oranges                 | 0.000 |    | Howe et al.     | 1 |
| Oranges                                    | Oranges                 | 0.000 |    | Howe et al.     | 1 |
| Other fruits                               | Fresh fruit             | 0.000 |    | Pobel et al.    | 2 |
|                                            | Fruit, fresh            | 0.005 | 24 | Tricker et al.  | 2 |
|                                            | Fruit, products         | 0.005 | 8  | Tricker et al.  | 2 |
| Peaches, apricots, plums,<br>or nectarines | Fresh fruit             | 0.000 |    | Pobel et al.    | 2 |
|                                            | Fruit, fresh            | 0.005 | 24 | Tricker et al.  | 2 |
|                                            | Fruit, products         | 0.005 | 8  | Tricker et al.  | 2 |
| Raw chile peppers                          | Green beans             | 0.000 |    | Pobel et al.    | 2 |
| Salsa (fruit or tomato) <sup>c</sup>       | Tomato, peppers, onions | 0.000 |    |                 |   |
| Onion <sup>d</sup>                         | Green beans             | 0.000 |    | Pobel et al.    | 2 |
| Tomatoes or tomato juice                   | Tomatoes                | 0.000 |    | Howe et al.     | 1 |
|                                            | Tomato                  | 0.000 |    | Pobel et al.    | 2 |
| <b>Grain Products</b>                      |                         |       |    |                 |   |
| Biscuits, scones, croissants, muffins      | Biscuits                | 0.015 | 3  | Tricker et al.  | 2 |
| Cereal                                     | Cereal, cooked          | 0.000 |    | Howe et al.     | 1 |
|                                            | Cereal products         | 0.050 | 11 | Osterdahl       | 2 |
|                                            | Cereal products         | 0.018 | 10 | Tricker et al.  | 2 |
| Dark bread                                 | Wheat flour             | 0.000 |    | Pobel et al.    | 2 |
| Rice or pasta                              | Pasta                   | 0.000 |    | Howe et al.     | 1 |
|                                            | Rice, non specific      | 0.000 |    | Howe et al.     | 1 |
|                                            | Pasta, rice             | 0.000 |    | Pobel et al.    | 2 |
| Tortilla                                   | Bread (non specific)    | 0.000 |    | Howe et al.     | 1 |
|                                            | White bread             | 0.000 |    | Pobel et al.    | 2 |
|                                            | Bread (non specific)    | 0.015 | 3  | Tricker et al.  | 2 |
| White bread                                | Bread (non specific)    | 0.000 |    | Howe et al.     | 1 |
|                                            | White bread             | 0.000 |    | Pobel et al.    | 2 |
|                                            | Bread (non specific)    | 0.015 | 3  | Tricker et al.  | 2 |
| <b>Meat and Bean Products</b>              |                         |       |    |                 |   |
| Bacon                                      | Bacon                   | 2.100 | 18 | Canas et al.    | 1 |
|                                            | Bacon                   | 0.500 |    | Howe et al.     | 1 |
|                                            | Bacon                   | 2.107 | 39 | Vecchio et al.  | 1 |
|                                            | Bacon                   | 0.140 | 5  | Klein et al.    | 2 |
|                                            | Bacon                   | 0.930 | 68 | Osterdahl       | 2 |
|                                            | Bacon                   | 0.111 | 4  | Tricker et al.  | 2 |
| Beans or lentils                           | Peas                    | 0.000 |    | Pobel et al.    | 2 |
| Beans, refried                             | Peas                    | 0.000 |    | Pobel et al.    | 2 |
| Beef, pork, lamb <sup>e</sup>              |                         |       |    |                 |   |
| <i>Pork sub group</i>                      | Pork                    | 0.000 |    | Howe et al.     | 1 |
|                                            | Pork                    | 2.825 | 17 | Sen et al. 1988 | 1 |
|                                            | Ham                     | 0.020 | 4  | Klein et al.    | 2 |
|                                            | Ham                     | 0.010 | 4  | Klein et al.    | 2 |
|                                            | Ham (non smoked)        | 0.100 | 9  | Klein et al.    | 2 |
|                                            | Pork                    | 0.500 | 21 | Osterdahl       | 2 |

|                          |                            |       |    |                      |   |
|--------------------------|----------------------------|-------|----|----------------------|---|
|                          | Pork                       | 0.350 | 18 | Osterdahl            | 2 |
|                          | Ham                        | 0.040 |    | Pobel et al.         | 2 |
| <i>Beef sub group</i>    | Corned beef                | 0.000 |    | Howe et al.          | 1 |
| <i>Meat sub group</i>    | Meat products              | 0.100 | 23 | Osterdahl            | 2 |
|                          | Meat products              | 0.090 | 14 | Osterdahl            | 2 |
|                          | Red meat                   | 0.000 |    | Pobel et al.         | 2 |
|                          | Smoked meat                | 0.035 |    | Pobel et al.         | 2 |
| Chicken livers           | Liver, beef                | 0.000 |    | Howe et al.          | 1 |
|                          | Pâté (campagne)            | 0.040 | 2  | Klein et al.         | 2 |
| Chicken or turkey        | Poultry                    | 0.011 |    | Pobel et al.         | 2 |
|                          | Poultry                    | 0.128 | 3  | Tricker et al.       | 2 |
| Eggs                     | Egg                        | 0.000 |    | Howe et al.          | 1 |
|                          | Egg                        | 0.000 |    | Pobel et al.         | 2 |
| Fish                     | Fish, other                | 0.000 |    | Howe et al.          | 1 |
|                          | Fish, pickled              | 3.200 |    | Howe et al.          | 1 |
|                          | Fish, salted               | 3.200 |    | Howe et al.          | 1 |
|                          | Fish, smoked               | 2.590 |    | Howe et al.          | 1 |
|                          | Fish                       | 0.020 | 53 | Cornee               | 2 |
|                          | Fish                       | 2.590 |    | Cornee               | 2 |
|                          | Fish                       | 0.105 |    | Key et al.           | 2 |
|                          | Baltic herring             | 0.250 | 5  | Osterdahl            | 2 |
|                          | Baltic herring (fermented) | 0.030 | 1  | Osterdahl            | 2 |
|                          | Fish                       | 0.150 | 61 | Osterdahl            | 2 |
|                          | Salmon (pickled)           | 0.080 | 8  | Osterdahl            | 2 |
|                          | Fish (pickled)             | 0.110 |    | Pedersen and Meyland | 2 |
|                          | Fresh fish                 | 0.022 |    | Pobel et al.         | 2 |
|                          | Smoked fish                | 2.590 |    | Pobel et al.         | 2 |
|                          | Fish, fresh                | 0.300 | 8  | Tricker et al.       | 2 |
|                          | Fish, smoked               | 0.143 | 4  | Tricker et al.       | 2 |
|                          | Fish, tinned               | 0.210 | 5  | Tricker et al.       | 2 |
| Hamburger                | Meat products              | 0.100 | 23 | Osterdahl            | 2 |
|                          | Meat products              | 0.090 | 14 | Osterdahl            | 2 |
|                          | Red meat                   | 0.000 |    | Pobel et al.         | 2 |
|                          | Smoked meat                | 0.035 |    | Pobel et al.         | 2 |
| Hot dogs                 | Sausage (beef and pork)    | 0.060 |    | Howe et al.          | 1 |
|                          | Saucisson                  | 0.660 | 8  | Klein et al.         | 2 |
|                          | Cured meat (sausage)       | 0.215 |    | Pobel et al.         | 2 |
|                          | Sausage                    | 0.092 | 14 | Tricker et al.       | 2 |
| Liver                    | Liver, beef                | 0.000 |    | Howe et al.          | 1 |
|                          | Pâté (campagne)            | 0.040 | 2  | Klein et al.         | 2 |
| Organ meats and tongue   | Offals                     | 0.000 |    | Pobel et al.         | 2 |
|                          | Offals                     | 0.097 | 3  | Tricker et al.       | 2 |
| Peas or lima beans       | Peas                       | 0.000 |    | Pobel et al.         | 2 |
| Processed meats          |                            |       |    |                      |   |
| <i>Sausage sub group</i> | Sausage (beef and pork)    | 0.060 |    | Howe et al.          | 1 |
|                          | Saucisson                  | 0.660 | 8  | Klein et al.         | 2 |



|                                              |                                     |       |    |                  |   |
|----------------------------------------------|-------------------------------------|-------|----|------------------|---|
|                                              | Cured meat (sausage)                | 0.215 |    | Pobel et al.     | 2 |
|                                              | Sausage                             | 0.092 | 14 | Tricker et al.   | 2 |
| <i>Salami sub group</i>                      | Salami                              | 0.660 | 8  | Klein et al.     | 2 |
|                                              | Salami                              | 1.985 | 10 | Yamamoto et al.  | 5 |
| <i>Pâté sub group</i>                        | Pâté (campagne)                     | 0.040 | 2  | Klein et al.     | 2 |
| <i>Preserved meat sub group</i>              | Preserved meat                      | 0.035 |    | Pobel et al.     | 2 |
| <b>Vegetable Products</b>                    |                                     |       |    |                  |   |
| Broccoli                                     | Green beans                         | 0.000 |    | Pobel et al.     | 2 |
| Cabbage, cauliflower,<br>or Brussels sprouts | Cabbage                             | 0.000 |    | Howe et al.      | 1 |
|                                              | Cabbage                             | 0.000 |    | Pobel et al.     | 2 |
|                                              | Cabbage                             | 0.000 |    | Siciliano et al. | 3 |
|                                              | Kale                                | 0.000 |    | Siciliano et al. | 3 |
|                                              | Kale                                | 0.000 |    | Siciliano et al. | 3 |
|                                              | Sauerkraut                          | 0.000 |    | Siciliano et al. | 3 |
| Carrots (cooked, raw) <sup>f</sup>           | Carrots                             | 0.000 |    | Howe et al.      | 1 |
|                                              | Carrot                              | 0.000 |    | Pobel et al.     | 2 |
| Corn                                         | Green beans                         | 0.000 |    | Pobel et al.     | 2 |
| Potatoes                                     | Potatoes, non specific              | 0.000 |    | Howe et al.      | 1 |
|                                              | Potatoes                            | 0.000 |    | Pobel et al.     | 2 |
| Soy milk or soy yogurt                       | Soya sauce                          | 0.000 | 4  | Osterdahl        | 2 |
| Spinach or collard greens                    | Lettuce                             | 0.000 |    | Pobel et al.     | 2 |
|                                              | Spinach                             | 0.000 |    | Pobel et al.     | 2 |
| Squash                                       | Green beans                         | 0.000 |    | Pobel et al.     | 2 |
| String beans                                 | Green beans                         | 0.000 |    | Pobel et al.     | 2 |
| Tofu, tempeh or soy burgers                  | Soya sauce                          | 0.000 | 4  | Osterdahl        | 2 |
| Yams or sweet potatoes                       | Potatoes, non specific              | 0.000 |    | Howe et al.      | 1 |
|                                              | Potatoes                            | 0.000 |    | Pobel et al.     | 2 |
| <b>Fats, Oils, Nuts, and Sweets</b>          |                                     |       |    |                  |   |
| Butter                                       | Butter and cream                    | 0.000 |    | Pobel et al.     | 2 |
| Cake or donut                                | Cake                                | 0.000 |    | Pobel et al.     | 2 |
| Candy without chocolate                      | Sugar, sweets                       | 0.034 |    | Pobel et al.     | 2 |
| Chocolate                                    | Chocolate bar                       | 0.030 | 15 | Osterdahl        | 2 |
|                                              | Chocolate beverage<br>powders       | 0.030 | 2  | Osterdahl        | 2 |
|                                              | Cocoa                               | 0.070 | 12 | Osterdahl        | 2 |
|                                              | Sugar, chocolate, sweets            | 0.034 |    | Pobel et al.     | 2 |
| Cookies <sup>c</sup>                         | Sugar, butter, milk, eggs,<br>flour | 0.007 |    |                  |   |
| French fried potatoes                        | Potatoes, non specific              | 0.000 |    | Howe et al.      | 1 |
|                                              | Potatoes                            | 0.000 |    | Pobel et al.     | 2 |
|                                              | Potatoes (hash brown)               | 0.000 |    | Siciliano et al. | 3 |
| Margarine                                    | Margarine                           | 0.000 |    | Howe et al.      | 1 |
| Nuts                                         | Salad dressing                      | 0.000 |    | Howe et al.      | 2 |
|                                              | Oil                                 | 0.000 |    | Pobel et al.     | 2 |
| Oil and vinegar dressing                     | Salad dressing                      | 0.000 |    | Howe et al.      | 2 |
|                                              | Oil                                 | 0.000 |    | Pobel et al.     | 2 |

|                            |                        |       |     |                 |   |
|----------------------------|------------------------|-------|-----|-----------------|---|
| Peanut butter              | Salad dressing         | 0.000 |     | Howe et al.     | 2 |
|                            | Oil                    | 0.000 |     | Pobel et al.    | 2 |
| Pie                        | Pie                    | 0.000 |     | Howe et al.     | 1 |
| Potato chips or corn chips | Potatoes, non specific | 0.000 |     | Howe et al.     | 1 |
|                            | Potatoes               | 0.000 |     | Pobel et al.    | 2 |
| <b>Alcoholic Beverages</b> |                        |       |     |                 |   |
| Beer                       | Beer                   | 0.280 |     | Howe et al.     | 1 |
|                            | Beer                   | 0.044 |     | Cornee          | 2 |
|                            | Beer                   | 0.030 | 258 | Osterdahl       | 2 |
|                            | Beer                   | 0.028 |     | Pobel et al.    | 2 |
|                            | Beer                   | 0.310 | 190 | Spiegelhalder   | 2 |
|                            | Beer                   | 0.165 | 99  | Spiegelhalder   | 2 |
|                            | Beer                   | 0.024 | 39  | Tricker et al.  | 2 |
|                            | Beer                   | 0.248 | 15  | Sen et al. 1980 | 3 |
| Wine                       | Wine                   | 0.015 | 180 | Osterdahl       | 2 |
|                            | Wine                   | 0.015 | 27  | Tricker et al.  | 2 |
|                            | Wine                   | 0.005 | 8   | Sen et al. 1980 | 3 |
| Liquor and mixed drinks    | Liquor                 | 0.100 |     | Howe et al.     | 1 |
|                            | Whisky                 | 0.130 | 45  | Osterdahl       | 2 |
|                            | Spirits                | 0.020 | 39  | Osterdahl       | 2 |
|                            | Spirits                | 0.180 |     | Pobel et al.    | 2 |
|                            | Spirits                | 0.015 | 48  | Tricker et al.  | 2 |
| Malt beverages             | Imported malt          | 0.355 | 30  | Osterdahl       | 2 |
|                            | Domestic malt          | 0.065 | 48  | Osterdahl       | 2 |
|                            | Malt beverages         | 0.030 | 39  | Osterdahl       | 2 |
|                            | Malt beverages         | 0.073 | 12  | Tricker et al.  | 2 |
|                            | Whiskey                | 0.040 | 1   | Sen et al. 1980 | 3 |

<sup>a</sup> Displayed is the sum of all types of nitrosamines reported. Most estimates reported in literature did not permit range for total nitrosamines.

<sup>b</sup> Information provided when reported in the literature

<sup>c</sup> Recipe calculation

<sup>d</sup> Item used in recipe calculation for salsa

<sup>e</sup> Beef, pork, lamb as a sandwich or mixed dish and beef, pork, lamb as a main dish are made up of the same values, only the serving size is different.

<sup>f</sup> Carrots raw or cooked are made up of the same values, only the serving size is different.
